# Supplementary material
Source: publisher figshare collection journal article supplement (https://springernature.figshare.com/ndownloader/files/13476365)
Supplement: Supplementary file 1 [file 13476365]

## Additional file 1: Appendix A: The Rubric Employed in Textual Analysis

**Field: Ο ELT Ο Applied Linguistics Ο TESOL Ο Education**

**Thesis Name/Type: The University where the thesis was conducted:**

**Author: Year: The length of words of the thesis: The Amount of Citations in the thesis:**

| **Type of Transformations** | Ο Direct quotation  Ο Patchwriting  Ο Paraphrase  Ο Summary  O Critical evaluation | | | | | | | | | | | | |
| --- | --- | --- | --- | --- | --- | --- | --- | --- | --- | --- | --- | --- | --- |
| **Location of Source Text** | Ο Abstract  Ο Introduction  Ο Literature  Review  Ο Methodology  Ο Results and  Discussion  Ο Conclusion /  Implications  Ο Books  Ο Website  Ο Panel  Ο Software  Ο Reports  Ο Magazines | | | | | | | | | | | | |
| **Location of Target Text** | Ο Abstract  Ο Introduction  Ο Literature Review  Ο Methodology  Ο Results and  Discussion  Ο Conclusion /  Implications  Ο Limitations | | | | | | |  |  |  |  |  | |
| **Source Text** |  |  |  |  |  |  |  |  |  |  |  |  |
| **Target Text** |  |  |  |  |  |  |  |  |  |  |  |  |
| **Page**  **Number** |  |  |  |  |  |  |  |  |  |  |  |  |
